# Supplementary material for: COVID-19 control strategies and intervention effects in resource limited settings: A modeling study
Source: PubMed Central journal article supplement (PMC8172066; doi:10.1371/journal.pone.0252570), 2021-06-02
Supplement: pone.0252570.s001.pdf [file pone.0252570.s001.pdf]

**COVID-19 control strategies and intervention effects  
in resource limited settings: A modeling study**

## SA: Notes on Parameters

In this section we further explain how some of our parameters were obtained.

### Contact Rates ( $m_{ij}$ )

$$m_{ij} = m_{ij}(h) + m_{ij}(w) + m_{ij}(s) + m_{ij}(o)$$

Where (h): home, (w): work, (s): school and (o): other place of contact. We obtained values for  $m_{ij}(h)$ ,  $m_{ij}(w)$ ,  $m_{ij}(s)$ ,  $m_{ij}(o)$  from Prem et. al.[1] Interventions that change contact patterns give a new contact matrix that reflects the change.

### Duration per contact ( $\tau$ ):

Duration per contact ( $\tau_i$ ) for an age-group  $i$  is given by the reciprocal of the total number of contacts per day ( $m_i$ ) for that age group.

$$m_i = \sum_{j=1}^{16} m_{ij}$$

$$\tau_i = 1/m_i$$

The duration per contact between susceptible individuals in age-group  $i$  with infectious individuals in age-group  $j$ , denoted by  $\tau_{ij}$ , is the same as  $\tau_i$  because for any given age-group  $i$ , all contacts across age-groups  $j$  are assumed to be of the same duration.[2] Nepal's age-distribution across all 5-year age-groups is also included in the table below:

| Table S1: Age-specific total number of contacts and duration per contact |           |                                  |                                            |                                         |
|--------------------------------------------------------------------------|-----------|----------------------------------|--------------------------------------------|-----------------------------------------|
| S No.                                                                    | Age group | Percentage of the population [3] | Total number of contacts ( $m_i$ ) (1/day) | Duration per contact ( $\tau_i$ ) (day) |

|    |             |      |       |       |
|----|-------------|------|-------|-------|
| 1  | 0-4 years   | 9.4  | 20.93 | 0.048 |
| 2  | 5-9 years   | 9.7  | 31.95 | 0.031 |
| 3  | 10-14 years | 10.4 | 29.64 | 0.034 |
| 4  | 15-19 years | 11.2 | 29.85 | 0.034 |
| 5  | 20-24 years | 11.1 | 18.70 | 0.053 |
| 6  | 25-29 years | 8.7  | 16.35 | 0.061 |
| 7  | 30-34 years | 6.8  | 15.05 | 0.066 |
| 8  | 35-39 years | 5.9  | 14.30 | 0.070 |
| 9  | 40-44 years | 5.4  | 13.04 | 0.077 |
| 10 | 45-49 years | 4.9  | 11.14 | 0.090 |
| 11 | 50-54 years | 4.2  | 12.56 | 0.080 |
| 12 | 55-59 years | 3.5  | 12.26 | 0.082 |
| 13 | 60-64 years | 2.8  | 10.11 | 0.099 |
| 14 | 65-69 years | 2.3  | 5.59  | 0.179 |
| 15 | 70-74 years | 1.6  | 3.33  | 0.301 |
| 16 | 75 + years  | 1.8  | 4.88  | 0.205 |

### Transmissions per day ( $\eta$ ):

Transmissions per day ( $\eta$ ) is simply calculated as the ratio of the Reproduction number ( $R_0$ ) and the infectious duration ( $1/\gamma$ ). Since  $R_0$  is sampled from a uniform distribution (2.0--2.8) and infectious duration is 7 days, the values of  $\eta$  range between  $2/7 = 0.29$  per day to  $2.8/7 = 0.4$  per day.

## Transmission rate ( $\beta_{ij}$ )

Based on the above values, the age-specific transmission rate is then calculated as follows (Equations (i) and (ii) in the main text):

$$\beta_{ij} = \rho_{ij} * m_{ij} = (1 - e^{-\eta \tau_{ij}}) * m_{ij}$$

## Excess mortality factor ( $\theta$ )

Calculation of the excess mortality factor is explained in Section SC:

## General ward and ICU mortality ratios

The general ward and ICU mortality ratios are calculated by dividing the age-specific mortality ratios by the hospitalization rate and multiplying by the ICU death factor ( $f = 0.8$ ) for ICU mortality ratio and  $(1-f)$  for the General ward mortality ratio. We assume that all deaths happen among patients who require hospitalization. Nepal's age-distribution across all 5-year age-groups is also included in the table below:

| S No. | Age group   | Percentage of the population [3] | Infection fatality ratio % [4] | Hospitalization rate % [4] | General ward mortality ratio ( $\psi$ ) % | ICU mortality ratio ( $\omega$ ) % |
|-------|-------------|----------------------------------|--------------------------------|----------------------------|-------------------------------------------|------------------------------------|
| 1     | 0-4 years   | 9.4                              | 0.0016                         | 0.01                       | 3.20                                      | 12.80                              |
| 2     | 5-9 years   | 9.7                              | 0.0016                         | 0.01                       | 3.20                                      | 12.80                              |
| 3     | 10-14 years | 10.4                             | 0.0069                         | 0.0408                     | 3.41                                      | 13.63                              |
| 4     | 15-19 years | 11.2                             | 0.0069                         | 0.0408                     | 3.41                                      | 13.63                              |

|    |             |      |        |      |      |       |
|----|-------------|------|--------|------|------|-------|
| 5  | 20-24 years | 11.1 | 0.0309 | 1.04 | 0.59 | 2.38  |
| 6  | 25-29 years | 8.7  | 0.0309 | 1.04 | 0.59 | 2.38  |
| 7  | 30-34 years | 6.8  | 0.0844 | 3.43 | 0.49 | 1.97  |
| 8  | 35-39 years | 5.9  | 0.0844 | 3.43 | 0.49 | 1.97  |
| 9  | 40-44 years | 5.4  | 0.161  | 4.25 | 0.76 | 3.03  |
| 10 | 45-49 years | 4.9  | 0.161  | 4.25 | 0.76 | 3.03  |
| 11 | 50-54 years | 4.2  | 0.595  | 8.16 | 1.46 | 5.83  |
| 12 | 55-59 years | 3.5  | 0.595  | 8.16 | 1.46 | 5.83  |
| 13 | 60-64 years | 2.8  | 1.93   | 11.8 | 3.27 | 13.08 |
| 14 | 65-69 years | 2.3  | 1.93   | 11.8 | 3.27 | 13.08 |
| 15 | 70-74 years | 1.6  | 4.28   | 16.6 | 5.16 | 20.63 |
| 16 | 75 + years  | 1.8  | 7.8    | 16.6 | 9.40 | 37.59 |

## **SB: Estimates of Intervention Effectiveness**

Here we present detailed estimates for the effectiveness of interventions that we considered in reducing the epidemic burden, health services demand and the mortality burden of the interventions, as compared to the baseline scenario. Estimates presented are the number of individuals or deaths, unless they are temporal estimates when they represent the number of days since the beginning of our simulation on March 24. For each intervention, we present the mean, median, interquartile range, maximum and minimum under each scenario. Figures in table 3 in the main text are a summary of the figures in this table, expressed as a percentage of the baseline estimates.

Table S3: Interventions against COVID-19 and their effectiveness

| Intervention       | Variable                     | Min.   | Q1     | Median | Mean   | Q2     | Max.   |
|--------------------|------------------------------|--------|--------|--------|--------|--------|--------|
| Base Scenario (BC) | Peak Prevalence (Infectious) | 194835 | 249753 | 291636 | 295356 | 334778 | 426863 |
| Base Scenario (BC) | Infectious Peak (day)        | 72     | 91     | 101    | 102    | 112    | 140    |
| Base Scenario (BC) | Peak Prevalence (Exposed)    | 133910 | 226911 | 249671 | 256625 | 290729 | 392857 |
| Base Scenario (BC) | Exposed Peak (day)           | 67     | 86     | 96     | 97     | 107    | 134    |
| Base Scenario (BC) | Gen Bed Demand at Peak       | 31665  | 39973  | 46397  | 46667  | 52493  | 64946  |
| Base Scenario (BC) | Gen Bed Peak (day)           | 78     | 97     | 108    | 108    | 119    | 146    |
| Base Scenario (BC) | ICU Bed Demand at Peak       | 4622   | 5772   | 6643   | 6659   | 7461   | 9017   |
| Base Scenario (BC) | ICU Peak Day                 | 83     | 103    | 113    | 114    | 124    | 152    |
| Base Scenario (BC) | Deaths                       | 9290   | 9927   | 10373  | 10277  | 10659  | 11076  |
| Lockdown (LD1)     | Peak Prevalence (Infectious) | 205524 | 259629 | 299939 | 305182 | 342137 | 414788 |
| Lockdown (LD1)     | Infectious Peak (day)        | 109    | 125    | 138    | 138    | 149    | 178    |
| Lockdown (LD1)     | Peak Prevalence (Exposed)    | 136802 | 227313 | 269024 | 266748 | 307636 | 405029 |
| Lockdown (LD1)     | Exposed Peak (day)           | 104    | 120    | 132    | 132    | 144    | 173    |
| Lockdown (LD1)     | Gen Bed Demand at Peak       | 33271  | 41557  | 47701  | 48132  | 53793  | 63450  |
| Lockdown (LD1)     | Gen Bed Peak (day)           | 115    | 131    | 144    | 144    | 156    | 185    |
| Lockdown (LD1)     | ICU Bed Demand at Peak       | 4843   | 5991   | 6828   | 6857   | 7618   | 8836   |
| Lockdown (LD1)     | ICU Peak Day                 | 120    | 137    | 150    | 150    | 162    | 191    |
| Lockdown (LD1)     | Deaths                       | 9341   | 9971   | 10540  | 10371  | 10756  | 11088  |
| Lockdown (LD2)     | Peak Prevalence (Infectious) | 210083 | 251389 | 299339 | 296906 | 343021 | 402900 |
| Lockdown (LD2)     | Infectious Peak (day)        | 146    | 160    | 176    | 180    | 196    | 219    |

|                           |                              |        |        |        |        |        |        |
|---------------------------|------------------------------|--------|--------|--------|--------|--------|--------|
| Lockdown (LD2)            | Peak Prevalence (Exposed)    | 129140 | 201857 | 247726 | 249524 | 295804 | 393189 |
| Lockdown (LD2)            | Exposed Peak (day)           | 140    | 155    | 170    | 174    | 190    | 213    |
| Lockdown (LD2)            | Gen Bed Demand at Peak       | 33941  | 40268  | 47521  | 46875  | 53933  | 62052  |
| Lockdown (LD2)            | Gen Bed Peak (day)           | 151    | 166    | 182    | 186    | 202    | 226    |
| Lockdown (LD2)            | ICU Bed Demand at Peak       | 4935   | 5799   | 6798   | 6686   | 7652   | 8680   |
| Lockdown (LD2)            | ICU Peak Day                 | 157    | 172    | 188    | 192    | 208    | 231    |
| Lockdown (LD2)            | Deaths                       | 9169   | 9771   | 10320  | 10241  | 10741  | 11062  |
| Physical distancing (PD1) | Peak Prevalence (Infectious) | 38933  | 64799  | 102036 | 100378 | 130331 | 165418 |
| Physical distancing (PD1) | Infectious Peak (day)        | 180    | 209    | 239    | 254    | 303    | 366    |
| Physical distancing (PD1) | Peak Prevalence (Exposed)    | 20709  | 50615  | 78950  | 83175  | 113651 | 169763 |
| Physical distancing (PD1) | Exposed Peak (day)           | 174    | 203    | 233    | 248    | 297    | 366    |
| Physical distancing (PD1) | Gen Bed Demand at Peak       | 6175   | 10607  | 16608  | 16327  | 21278  | 26779  |
| Physical distancing (PD1) | Gen Bed Peak (day)           | 186    | 216    | 245    | 261    | 310    | 366    |
| Physical distancing (PD1) | ICU Bed Demand at Peak       | 891    | 1578   | 2453   | 2408   | 3137   | 3919   |
| Physical distancing (PD1) | ICU Peak Day                 | 192    | 221    | 251    | 266    | 315    | 366    |
| Physical distancing (PD1) | Deaths                       | 1777   | 4927   | 6922   | 6322   | 7946   | 8657   |
| Physical distancing (PD2) | Peak Prevalence (Infectious) | 174154 | 229487 | 254454 | 249062 | 269278 | 297315 |
| Physical distancing (PD2) | Infectious Peak (day)        | 172    | 213    | 233    | 233    | 249    | 280    |
| Physical distancing (PD2) | Peak Prevalence (Exposed)    | 100078 | 186827 | 221787 | 220225 | 251415 | 322279 |
| Physical distancing (PD2) | Exposed Peak (day)           | 166    | 207    | 228    | 227    | 243    | 275    |
| Physical distancing (PD2) | Gen Bed Demand at Peak       | 27986  | 36989  | 40855  | 39947  | 43004  | 46767  |
| Physical distancing (PD2) | Gen Bed Peak (day)           | 179    | 219    | 239    | 239    | 255    | 287    |
| Physical distancing (PD2) | ICU Bed Demand at Peak       | 4080   | 5363   | 5862   | 5752   | 6185   | 6646   |
| Physical distancing (PD2) | ICU Peak Day                 | 184    | 224    | 245    | 244    | 261    | 293    |
| Physical distancing (PD2) | Deaths                       | 9310   | 9844   | 10096  | 10072  | 10367  | 10783  |

|                              |                              |       |       |        |        |        |        |
|------------------------------|------------------------------|-------|-------|--------|--------|--------|--------|
| Active Case Finding 5% (CF1) | Peak Prevalence (Infectious) | 32061 | 57011 | 81448  | 86135  | 110958 | 161562 |
| Active Case Finding 5% (CF1) | Infectious Peak (day)        | 87    | 109   | 130    | 132    | 150    | 206    |
| Active Case Finding 5% (CF1) | Peak Prevalence (Exposed)    | 41038 | 65514 | 89143  | 93706  | 119021 | 153095 |
| Active Case Finding 5% (CF1) | Exposed Peak (day)           | 83    | 105   | 125    | 127    | 145    | 201    |
| Active Case Finding 5% (CF1) | Gen Bed Demand at Peak       | 9280  | 14678 | 22108  | 22481  | 28599  | 39339  |
| Active Case Finding 5% (CF1) | Gen Bed Peak (day)           | 95    | 117   | 139    | 141    | 159    | 215    |
| Active Case Finding 5% (CF1) | ICU Bed Demand at Peak       | 1381  | 2170  | 3243   | 3286   | 4163   | 5649   |
| Active Case Finding 5% (CF1) | ICU Peak Day                 | 101   | 123   | 145    | 147    | 164    | 220    |
| Active Case Finding 5% (CF1) | Deaths                       | 5399  | 6436  | 7560   | 7412   | 8333   | 9083   |
| Active Case Finding 5% (CF2) | Peak Prevalence (Infectious) | 43832 | 64831 | 91890  | 93244  | 114708 | 166375 |
| Active Case Finding 5% (CF2) | Infectious Peak (day)        | 86    | 107   | 121    | 130    | 145    | 257    |
| Active Case Finding 5% (CF2) | Peak Prevalence (Exposed)    | 43472 | 74017 | 95195  | 99665  | 127356 | 163018 |
| Active Case Finding 5% (CF2) | Exposed Peak (day)           | 81    | 102   | 117    | 123    | 141    | 250    |
| Active Case Finding 5% (CF2) | Gen Bed Demand at Peak       | 10709 | 17777 | 24896  | 24033  | 30179  | 40212  |
| Active Case Finding 5% (CF2) | Gen Bed Peak (day)           | 93    | 115   | 131    | 135    | 154    | 198    |
| Active Case Finding 5% (CF2) | ICU Bed Demand at Peak       | 1591  | 2622  | 3640   | 3508   | 4382   | 5768   |
| Active Case Finding 5% (CF2) | ICU Peak Day                 | 99    | 121   | 136    | 140    | 160    | 203    |
| Active Case Finding 5% (CF2) | Deaths                       | 6511  | 7461  | 7988   | 7947   | 8525   | 9126   |
| Active Case Finding 5% (CF3) | Peak Prevalence (Infectious) | 38330 | 80348 | 112720 | 118689 | 151724 | 273215 |
| Active Case Finding 5% (CF3) | Infectious Peak (day)        | 68    | 84    | 97     | 100    | 112    | 156    |
| Active Case Finding 5% (CF3) | Peak Prevalence (Exposed)    | 48368 | 91615 | 126932 | 127024 | 159187 | 209088 |
| Active Case Finding 5% (CF3) | Exposed Peak (day)           | 63    | 80    | 92     | 96     | 108    | 151    |
| Active Case Finding 5% (CF3) | Gen Bed Demand at Peak       | 10661 | 22055 | 29633  | 29859  | 37944  | 55935  |
| Active Case Finding 5% (CF3) | Gen Bed Peak (day)           | 77    | 93    | 105    | 109    | 122    | 166    |
| Active Case Finding 5% (CF3) | ICU Bed Demand at Peak       | 1584  | 3244  | 4313   | 4317   | 5467   | 7786   |



|                               |                              |       |       |       |        |        |        |
|-------------------------------|------------------------------|-------|-------|-------|--------|--------|--------|
| Active Case Finding 5% (CF3)  | ICU Peak Day                 | 83    | 99    | 111   | 115    | 127    | 171    |
| Active Case Finding 5% (CF3)  | Deaths                       | 5562  | 7482  | 8125  | 8041   | 8855   | 9681   |
| Active Case Finding 10% (CT1) | Peak Prevalence (Infectious) | 621   | 8636  | 19667 | 21457  | 28305  | 69302  |
| Active Case Finding 10% (CT1) | Infectious Peak (day)        | 31    | 132   | 157   | 174    | 209    | 313    |
| Active Case Finding 10% (CT1) | Peak Prevalence (Exposed)    | 937   | 10435 | 24477 | 26458  | 40235  | 61438  |
| Active Case Finding 10% (CT1) | Exposed Peak (day)           | 31    | 129   | 154   | 171    | 206    | 312    |
| Active Case Finding 10% (CT1) | Gen Bed Demand at Peak       | 223   | 3706  | 7935  | 8309   | 12081  | 23686  |
| Active Case Finding 10% (CT1) | Gen Bed Peak (day)           | 100   | 147   | 171   | 186    | 220    | 326    |
| Active Case Finding 10% (CT1) | ICU Bed Demand at Peak       | 33    | 554   | 1181  | 1231   | 1789   | 3456   |
| Active Case Finding 10% (CT1) | ICU Peak Day                 | 105   | 149   | 173   | 190    | 226    | 323    |
| Active Case Finding 10% (CT1) | Deaths                       | 310   | 2945  | 4527  | 4171   | 5573   | 7012   |
| Active Case Finding 10% (CT2) | Peak Prevalence (Infectious) | 33538 | 51459 | 84028 | 108989 | 182986 | 206437 |
| Active Case Finding 10% (CT2) | Infectious Peak (day)        | 91    | 272   | 279   | 243    | 287    | 307    |
| Active Case Finding 10% (CT2) | Peak Prevalence (Exposed)    | 26168 | 49469 | 70646 | 96797  | 144312 | 236768 |
| Active Case Finding 10% (CT2) | Exposed Peak (day)           | 87    | 126   | 269   | 226    | 279    | 299    |
| Active Case Finding 10% (CT2) | Gen Bed Demand at Peak       | 9576  | 13176 | 18906 | 20549  | 29469  | 33439  |
| Active Case Finding 10% (CT2) | Gen Bed Peak (day)           | 100   | 140   | 280   | 229    | 290    | 311    |
| Active Case Finding 10% (CT2) | ICU Bed Demand at Peak       | 1421  | 1952  | 2776  | 3006   | 4278   | 4862   |
| Active Case Finding 10% (CT2) | ICU Peak Day                 | 106   | 145   | 286   | 235    | 295    | 317    |
| Active Case Finding 10% (CT2) | Deaths                       | 6613  | 7952  | 8931  | 8591   | 9296   | 9948   |
| LD1 + PD1 + CF1               | Peak Prevalence (Infectious) | 120   | 120   | 510   | 4293   | 5227   | 28123  |

|                 |                              |     |      |       |       |        |        |
|-----------------|------------------------------|-----|------|-------|-------|--------|--------|
| LD1 + PD1 + CF1 | Infectious Peak (day)        | 1   | 1    | 366   | 220   | 366    | 366    |
| LD1 + PD1 + CF1 | Peak Prevalence (Exposed)    | 65  | 65   | 457   | 4066  | 6727   | 20895  |
| LD1 + PD1 + CF1 | Exposed Peak (day)           | 1   | 1    | 366   | 238   | 366    | 366    |
| LD1 + PD1 + CF1 | Gen Bed Demand at Peak       | 11  | 13   | 124   | 1079  | 1303   | 7057   |
| LD1 + PD1 + CF1 | Gen Bed Peak (day)           | 8   | 10   | 365   | 251   | 366    | 366    |
| LD1 + PD1 + CF1 | ICU Bed Demand at Peak       | 1   | 2    | 18    | 157   | 183    | 1051   |
| LD1 + PD1 + CF1 | ICU Peak Day                 | 6   | 17   | 356   | 243   | 366    | 366    |
| LD1 + PD1 + CF1 | Deaths                       | 4   | 9    | 65    | 433   | 422    | 3739   |
| LD1 + PD1 + CF2 | Peak Prevalence (Infectious) | 120 | 877  | 27898 | 61540 | 131137 | 160524 |
| LD1 + PD1 + CF2 | Infectious Peak (day)        | 1   | 336  | 366   | 341   | 366    | 366    |
| LD1 + PD1 + CF2 | Peak Prevalence (Exposed)    | 102 | 1019 | 29384 | 49046 | 92080  | 156223 |
| LD1 + PD1 + CF2 | Exposed Peak (day)           | 278 | 334  | 366   | 350   | 366    | 366    |
| LD1 + PD1 + CF2 | Gen Bed Demand at Peak       | 14  | 118  | 972   | 3693  | 2131   | 25926  |
| LD1 + PD1 + CF2 | Gen Bed Peak (day)           | 290 | 347  | 366   | 354   | 366    | 366    |
| LD1 + PD1 + CF2 | ICU Bed Demand at Peak       | 2   | 15   | 455   | 1393  | 3134   | 3792   |
| LD1 + PD1 + CF2 | ICU Peak Day                 | 15  | 349  | 365   | 348   | 366    | 366    |
| LD1 + PD1 + CF2 | Deaths                       | 6   | 20   | 407   | 2353  | 5091   | 8120   |
| LD1 + PD1 + CF3 | Peak Prevalence (Infectious) | 120 | 120  | 1866  | 5071  | 8745   | 20085  |
| LD1 + PD1 + CF3 | Infectious Peak (day)        | 1   | 1    | 365   | 262   | 366    | 366    |
| LD1 + PD1 + CF3 | Peak Prevalence (Exposed)    | 65  | 148  | 1629  | 5062  | 9154   | 20007  |
| LD1 + PD1 + CF3 | Exposed Peak (day)           | 1   | 225  | 366   | 275   | 366    | 366    |
| LD1 + PD1 + CF3 | Gen Bed Demand at Peak       | 11  | 31   | 474   | 1321  | 2399   | 5260   |
| LD1 + PD1 + CF3 | Gen Bed Peak (day)           | 8   | 255  | 365   | 283   | 366    | 366    |
| LD1 + PD1 + CF3 | ICU Bed Demand at Peak       | 2   | 5    | 69    | 195   | 349    | 785    |
| LD1 + PD1 + CF3 | ICU Peak Day                 | 14  | 208  | 353   | 277   | 366    | 366    |

|                                                                        |                              |     |     |     |       |      |        |
|------------------------------------------------------------------------|------------------------------|-----|-----|-----|-------|------|--------|
| LD1 + PD1 + CF3                                                        | Deaths                       | 7   | 40  | 241 | 692   | 1020 | 3206   |
| LD1 + PD1 + CT1                                                        | Peak Prevalence (Infectious) | 120 | 120 | 120 | 120   | 120  | 120    |
| LD1 + PD1 + CT1                                                        | Infectious Peak (day)        | 1   | 1   | 1   | 1     | 1    | 1      |
| LD1 + PD1 + CT1                                                        | Peak Prevalence (Exposed)    | 65  | 65  | 65  | 67    | 67   | 75     |
| LD1 + PD1 + CT1                                                        | Exposed Peak (day)           | 1   | 1   | 1   | 2     | 3    | 6      |
| LD1 + PD1 + CT1                                                        | Gen Bed Demand at Peak       | 11  | 12  | 12  | 12    | 13   | 15     |
| LD1 + PD1 + CT1                                                        | Gen Bed Peak (day)           | 8   | 9   | 10  | 10    | 11   | 14     |
| LD1 + PD1 + CT1                                                        | ICU Bed Demand at Peak       | 1   | 2   | 2   | 2     | 2    | 2      |
| LD1 + PD1 + CT1                                                        | ICU Peak Day                 | 6   | 14  | 15  | 15    | 16   | 20     |
| LD1 + PD1 + CT1                                                        | Deaths                       | 2   | 3   | 4   | 4     | 5    | 15     |
| LD1 + PD1 + CT2                                                        | Peak Prevalence (Infectious) | 120 | 120 | 254 | 10439 | 5876 | 179013 |
| LD1 + PD1 + CT2                                                        | Infectious Peak (day)        | 1   | 1   | 366 | 191   | 366  | 366    |
| LD1 + PD1 + CT2                                                        | Peak Prevalence (Exposed)    | 65  | 65  | 293 | 8204  | 5071 | 94488  |
| LD1 + PD1 + CT2                                                        | Exposed Peak (day)           | 1   | 1   | 366 | 202   | 366  | 366    |
| LD1 + PD1 + CT2                                                        | Gen Bed Demand at Peak       | 11  | 12  | 33  | 1423  | 716  | 28709  |
| LD1 + PD1 + CT2                                                        | Gen Bed Peak (day)           | 8   | 9   | 366 | 195   | 366  | 366    |
| LD1 + PD1 + CT2                                                        | ICU Bed Demand at Peak       | 1   | 2   | 4   | 4     | 82   | 4118   |
| LD1 + PD1 + CT2                                                        | ICU Peak Day                 | 6   | 15  | 365 | 197   | 366  | 366    |
| LD1 + PD1 + CT2                                                        | Deaths                       | 2   | 3   | 7   | 7     | 60   | 3854   |
| Note: Q1: First Quartile, Q3: Third Quartile. ICU: Intensive Care Unit |                              |     |     |     |       |      |        |

## SC: Effect of Hospital Capacity Expansion

The difference in access to health services is likely to result in a significant difference in mortality rates between China and Kathmandu. We accounted for this difference in the following way. Until patient volumes surpass capacity, we assume that age-specific mortality rates will remain the same as they were in China. On any day that demands exceed bed capacity, we assume that mortality rate for patients unable to find hospital beds increases proportionate to the relative deficit of per-capita hospital beds in Kathmandu as compared to China. We calculated this relative deficit by subtracting the bed ratio in Kathmandu from the ratio in China and dividing it by the bed ratio in Kathmandu. An early analysis from China has found that mortality correlates with epidemic burden beyond health service capacity.[5] We then calculated excess deaths due to the lack of healthcare. Two other factors are likely to contribute to a difference in mortality rates: age structure and comorbidities. We adjusted the mortality ratio to the first factor. Given comparable rates of risk factors like obesity and smoking between China and urban Nepal, we assume they have comparable comorbidity burden.[6-8]

With an estimated 5400 hospital beds, including about 250 critical care beds with mechanical ventilators Kathmandu has 2 hospital beds per thousand people, while China has about 4.2 beds per thousand.[9,10] Based on these figures, the excess-mortality factor ( $\theta$ ) is  $(4.2-2)/2 = 1.1$ , when the demand for beds exceeds capacity and 0 when the demand is below capacity. The excess-mortality factor falls to 0.7 when there are an extra thousand beds in Kathmandu and to 0.52 when there are an extra 2000 beds. In our base scenario, accounting for the relative deficit of health services in Kathmandu as compared to China (excess mortality factor) would lead to mortality to increase by 10 100 to 20 500, as compared to the base scenario. If total bed capacity were increased by a 1000, this excess mortality would fall by 32% and by 49% if capacity could be increased by 2 000 beds. If a capacity increase of 1 000 beds could be combined with a month long lockdown along with year-long physical distancing measures the excess mortality due to the deficit of healthcare would fall by 89%.



## Bibliography

1. Prem K, Cook AR, Jit M. Projecting social contact matrices in 152 countries using contact surveys and demographic data. *PLoS Comput Biol*. 2017;13: e1005697. doi:10.1371/journal.pcbi.1005697
2. Saunders-Hastings P, Quinn Hayes B, Smith R, Krewski D. Modelling community-control strategies to protect hospital resources during an influenza pandemic in Ottawa, Canada. *PLoS ONE*. 2017;12: e0179315. doi:10.1371/journal.pone.0179315
3. Population of Nepal 2019 - PopulationPyramid.net [Internet]. [cited 20 Feb 2021]. Available: <https://www.populationpyramid.net/nepal/2019/>
4. Verity R, Okell LC, Dorigatti I, Winskill P, Whittaker C, Imai N, et al. Estimates of the severity of coronavirus disease 2019: a model-based analysis. *Lancet Infect Dis*. 2020;20: 669–677. doi:10.1016/S1473-3099(20)30243-7
5. Ji Y, Ma Z, Peppelenbosch MP, Pan Q. Potential association between COVID-19 mortality and health-care resource availability. *Lancet Glob Health*. 2020;8: e480. doi:10.1016/S2214-109X(20)30068-1
6. Rawal LB, Kanda K, Mahumud RA, Joshi D, Mehata S, Shrestha N, et al. Prevalence of underweight, overweight and obesity and their associated risk factors in Nepalese adults: Data from a Nationwide Survey, 2016. *PLoS ONE*. 2018;13: e0205912. doi:10.1371/journal.pone.0205912
7. Chen Y, Peng Q, Yang Y, Zheng S, Wang Y, Lu W. The prevalence and increasing trends of overweight, general obesity, and abdominal obesity among Chinese adults: a repeated cross-sectional study. *BMC Public Health*. 2019;19: 1293. doi:10.1186/s12889-019-7633-0
8. Ashwell M, Gunn P, Gibson S. Waist-to-height ratio is a better screening tool than waist circumference and BMI for adult cardiometabolic risk factors: systematic review and meta-analysis. *Obes Rev*. 2012;13: 275–286. doi:10.1111/j.1467-789X.2011.00952.x
9. Hospital beds (per 1,000 people). In: *The World Bank Data* [Internet]. 2020 [cited 23 Apr 2020]. Available: <https://data.worldbank.org/indicator/sh.med.beds.zs>
10. Paneru H. Intensive care units in the context of COVID-19 in Nepal: current status and need of the hour. *JSAN*. 2020;7.
